# Supplementary material
Source: PubMed Central journal article supplement (PMC6247895)
Supplement: NIHMS994635-supplement-Supplemental_Material.pdf [file NIHMS994635-supplement-Supplemental_Material.pdf]

Supplementary Table S1. *Model formulas for predicting carriage and intensity level of C. hepaticum.*

| Model                                                                             | Model formula             | AIC           | ΔAIC     |
|-----------------------------------------------------------------------------------|---------------------------|---------------|----------|
| Logistic regression for predicting carriage of <i>C. hepaticum</i>                | <b>Age+Valley</b>         | <b>228.5</b>  | <b>0</b> |
|                                                                                   | Age+Valley+Sewer          | 229.01        | 0.51     |
|                                                                                   | Age+Valley+Dogs           | 229.39        | 0.89     |
|                                                                                   | Age+Valley+Sewer+Dogs     | 230.16        | 1.66     |
| Ordinal logistic model formulas predicting intensity level of <i>C. hepaticum</i> | <b>Valley+Cats</b>        | <b>371.48</b> | <b>0</b> |
|                                                                                   | Valley+Cats+Rainfall      | 372.21        | 0.73     |
|                                                                                   | Valley                    | 372.42        | 0.94     |
|                                                                                   | Valley+Cats+Dogs          | 372.67        | 1.19     |
|                                                                                   | Valley+Rainfall           | 372.92        | 1.44     |
|                                                                                   | Valley+Cats+Rainfall+Dogs | 373.51        | 2.03     |
